# Supplementary material for: Global mRNA expression analysis in myosin II deficient strains of Saccharomyces cerevisiae reveals an impairment of cell integrity functions
Source: PubMed Central journal article supplement (PMC2253530; doi:10.1186/1471-2164-9-34), 2008-01-23
Supplement: 1471-2164-9-34-S1.pdf [file 1471-2164-9-34-S1.pdf]

| <b>YORF</b>                    | <b>Gene</b>  | <b>Molecular Function</b>                                                       | <b>Fold change</b> |
|--------------------------------|--------------|---------------------------------------------------------------------------------|--------------------|
| <b>Carbohydrate metabolism</b> |              |                                                                                 |                    |
| <i>YAL017W</i>                 | <i>PSK1</i>  | - protein serine/threonine kinase activity                                      | 1.6                |
| <i>YGL227W</i>                 | <i>VID30</i> | - molecular function unknown                                                    | 1.7                |
| <i>YJL155C</i>                 | <i>FBP26</i> | - fructose-2,6-bisphosphate 2-phosphatase activity                              | 2.2                |
| <i>YBR105C</i>                 | <i>VID24</i> | - molecular function unknown                                                    | 2.4                |
| <i>YGR143W</i>                 | <i>SKN1</i>  | - glucosidase activity                                                          | 2.4                |
| <i>YLR174W</i>                 | <i>IDP2</i>  | - isocitrate dehydrogenase NADP+ activity                                       | 2.6                |
| <i>YMR135C</i>                 | <i>GID8</i>  | - molecular function unknown                                                    | 2.8                |
| <i>YGL156W</i>                 | <i>AMS1</i>  | - alpha-mannosidase activity                                                    | 3.1                |
| <i>YPR026W</i>                 | <i>ATH1</i>  | - alpha,alpha-trehalase activity                                                | 3.5                |
| <i>YIL155C</i>                 | <i>GUT2</i>  | - glycerol-3-phosphate dehydrogenase activity                                   | 3.8                |
| <i>YHR104W</i>                 | <i>GRE3</i>  | - aldehyde reductase activity<br>- aldo-keto reductase activity                 | 4.1                |
| <i>YKR058W</i>                 | <i>GLG1</i>  | - glycogenin glucosyltransferase activity                                       | 4.6                |
| <i>YBR126C</i>                 | <i>TPS1</i>  | - alpha,alpha-trehalose-phosphate synthase UDP-forming activity                 | 5.3                |
| <i>YDR001C</i>                 | <i>NTH1</i>  | - alpha,alpha-trehalase activity                                                | 5.4                |
| <i>YCL040W</i>                 | <i>GLK1</i>  | - glucokinase activity                                                          | 6.82               |
| <i>YPR184W</i>                 | <i>GDB1</i>  | - 4-alpha-glucanotransferase activity<br>- amylo-alpha-1,6-glucosidase activity | 7.3                |
| <i>YEL011W</i>                 | <i>GLC3</i>  | - 1,4-alpha-glucan branching enzyme activity                                    | 7.4                |
| <i>YDR074W</i>                 | <i>TPS2</i>  | - trehalose-phosphatase activity                                                | 7.5                |
| <i>YKL035W</i>                 | <i>UGP1</i>  | - UTP-glucose-1-phosphate uridylyltransferase activity                          | 9.1                |
| <i>YGR256W</i>                 | <i>GND2</i>  | - phosphogluconate dehydrogenase decarboxylating activity                       | 9.9                |
| <i>YFR053C</i>                 | <i>HXK1</i>  | - hexokinase activity                                                           | 14.2               |
| <i>YBR117C</i>                 | <i>TKL2</i>  | - transketolase activity                                                        | 14.3               |
| <i>YPR160W</i>                 | <i>GPH1</i>  | - glycogen phosphorylase activity                                               | 18.9               |
| Down regulated                 |              |                                                                                 |                    |
| <i>YOL056W</i>                 | <i>GPM3</i>  | - NONE                                                                          | 1.5                |
| <i>YER120W</i>                 | <i>SCS2</i>  | - protein binding                                                               | 1.6                |
| <i>YER003C</i>                 | <i>PMI40</i> | - mannose-6-phosphate isomerase activity                                        | 2.0                |
| <i>YHR163W</i>                 | <i>SOL3</i>  | - 6-phosphogluconolactonase activity                                            | 2.1                |
| <i>YDL103C</i>                 | <i>QRH1</i>  | - UDP-N-acetylglucosamine diphosphorylase activity                              | 2.7                |
| <i>YKL127W</i>                 | <i>PGM1</i>  | - phosphoglucomutase activity                                                   | 3.2                |
| <i>YDL055C</i>                 | <i>PSA1</i>  | - mannose-1-phosphate guanylyltransferase                                       | 3.5                |

| <b>YORF</b>                               | <b>Gene</b>  | <b>Molecular Function</b>                                                        | <b>Fold change</b> |
|-------------------------------------------|--------------|----------------------------------------------------------------------------------|--------------------|
|                                           |              | activity                                                                         |                    |
| <b>protein amino acid phosphorylation</b> |              |                                                                                  |                    |
| <i>YJL141C</i>                            | <i>YAK1</i>  | - protein kinase activity                                                        | 2.5                |
| <i>YLL019C</i>                            | <i>KNS1</i>  | - protein serine/threonine kinase activity<br>- protein-tyrosine kinase activity | 2.8                |
| Down regulated                            |              |                                                                                  |                    |
| <i>YGR123C</i>                            | <i>PPT1</i>  | - protein serine/threonine phosphatase activity                                  | 2.0                |
| <b>signal transduction</b>                |              |                                                                                  |                    |
| <i>YOL081W</i>                            | <i>IRA2</i>  | - Ras GTPase activator activity                                                  | 3.7                |
| <i>YGL248W</i>                            | <i>PDE1</i>  | - cAMP-specific phosphodiesterase activity                                       | 2.5                |
| <i>YDR085C</i>                            | <i>AFR1</i>  | - receptor signaling protein activity                                            | 3.7                |
| <i>YOR134W</i>                            | <i>BAG7</i>  | - signal transducer activity<br>- Rho GTPase activator activity                  | 1.9                |
| <i>YNL027W</i>                            | <i>CRZ1</i>  | - transcription factor activity                                                  | 1.9                |
| <i>YNL173C</i>                            | <i>MDG1</i>  | - molecular_function unknown                                                     | 2.1                |
| <i>YJL005W</i>                            | <i>CYR1</i>  | - adenylate cyclase activity                                                     | 2.1                |
| Down regulated                            |              |                                                                                  |                    |
| <i>YOR101W</i>                            | <i>RAS1</i>  | - RAS small monomeric GTPase activity                                            | 2.2                |
| <b>budding</b>                            |              |                                                                                  |                    |
| <i>YDL188C</i>                            | <i>PPH22</i> | - protein phosphatase type 2A activity                                           | 1.7                |
| <i>YER008C</i>                            | <i>SEC3</i>  | - molecular_function unknown                                                     | 1.6                |
| <i>YGR070W</i>                            | <i>ROM1</i>  | - signal transducer activity<br>- Rho guanyl-nucleotide exchange factor activity | 3.2                |
| <i>YDR129C</i>                            | <i>SAC6</i>  | - actin cable sensu Saccharomyces<br>- actin cortical patch sensu Saccharomyces  | 1.8                |
| Down regulated                            |              |                                                                                  |                    |
| <i>YOR198C</i>                            | <i>BFR1</i>  | - RNA binding                                                                    | 2.4                |
| <i>YDR309C</i>                            | <i>GIC2</i>  | - small GTPase regulatory/interacting protein activity                           | 2.4                |
| <i>YOR326W</i>                            | <i>MYO2</i>  | - microfilament motor activity                                                   | 1.5                |
| <i>YDR507C</i>                            | <i>GIN4</i>  | - protein kinase activity                                                        | 2.2                |
| <i>YHR023W</i>                            | <i>MYO1</i>  | - microfilament motor activity                                                   | 4.5                |
| <b>Transport</b>                          |              |                                                                                  |                    |
| <i>YJR121W</i>                            | <i>ATP2</i>  | - hydrogen-transporting ATP synthase activity, rotational mechanism              | 2.8                |
| <i>YJR059W</i>                            | <i>PTK2</i>  | - protein kinase activity                                                        | 2.9                |
| <i>YPL134C</i>                            | <i>ODC1</i>  | - intracellular transporter activity                                             | 1.9                |

| <b>YORF</b>                             | <b>Gene</b>  | <b>Molecular Function</b>                                                                                      | <b>Fold change</b> |
|-----------------------------------------|--------------|----------------------------------------------------------------------------------------------------------------|--------------------|
|                                         |              | - organic acid transporter activity                                                                            |                    |
| <i>YDL234C</i>                          | <i>GYP7</i>  | - Rab GTPase activator activity                                                                                | 1.9                |
| <i>YKL188C</i>                          | <i>PXA2</i>  | - ATP-binding cassette ABC transporter activity                                                                | 2.5                |
| <i>YDR276C</i>                          | <i>PMP3</i>  | - molecular function unknown                                                                                   | 2.6                |
| <i>YLR093C</i>                          | <i>NYV1</i>  | - v-SNARE activity                                                                                             | 1.9                |
| <i>YGL006W</i>                          | <i>PMC1</i>  | - calcium-transporting ATPase activity                                                                         | 2.3                |
| <i>YLL043W</i>                          | <i>FPS1</i>  | - transporter activity<br>- glycerol transporter activity                                                      | 3.0                |
| <b>Down regulated</b>                   |              |                                                                                                                |                    |
| <i>YBR106W</i>                          | <i>PHO88</i> | - phosphate transporter activity                                                                               | 3.2                |
| <i>YOR216C</i>                          | <i>RUD3</i>  | - molecular function unknown                                                                                   | 2.4                |
| <i>YCR034W</i>                          | <i>FEN1</i>  | - fatty acid elongase activity                                                                                 | 2.9                |
| <i>YLR188W</i>                          | <i>MDL1</i>  | - ATP-binding cassette ABC transporter activity<br>- peptide-transporting ATPase activity<br>- ATPase activity | 1.9                |
| <i>YDL192W</i>                          | <i>ARF1</i>  | - ARF small monomeric GTPase activity                                                                          | 1.9                |
| <i>YMR241W</i>                          | <i>YHM2</i>  | - tricarboxylate carrier activity                                                                              | 2.7                |
| <i>YJL145W</i>                          | <i>SFH5</i>  | - phosphatidylinositol transporter activity                                                                    | 2.5                |
| <i>YGR172C</i>                          | <i>YIP1</i>  | - molecular function unknown                                                                                   | 1.7                |
| <i>YHR175W</i>                          | <i>CTR2</i>  | - copper ion transporter activity<br>- copper uptake transporter activity                                      | 1.9                |
| <i>YNL231C</i>                          | <i>PDR16</i> | - phosphatidylinositol transporter activity                                                                    | 1.9                |
| <i>YOL158C</i>                          | <i>ENB1</i>  | - ferric-enterobactin transporter activity                                                                     | 1.8                |
| <i>YAL022C</i>                          | <i>FUN26</i> | - nucleoside transporter activity                                                                              | 1.8                |
| <i>YAL007C</i>                          | <i>ERP2</i>  | - molecular function unknown                                                                                   | 2.5                |
| <i>YDR534C</i>                          | <i>FIT1</i>  | - molecular function unknown                                                                                   | 4.6                |
| <i>YDR170C</i>                          | <i>SEC7</i>  | - ARF guanyl-nucleotide exchange factor activity                                                               | 1.5                |
| <b>Cell organization and biogenesis</b> |              |                                                                                                                |                    |
| <i>YHR030C</i>                          | <i>SLT2</i>  | - MAP kinase activity                                                                                          | 2.1                |
| <i>YMR053C</i>                          | <i>STB2</i>  | - transcriptional repressor activity                                                                           | 1.7                |
| <i>YKR076W</i>                          | <i>ECM4</i>  | - molecular function unknown                                                                                   | 3.2                |
| <i>YDR077W</i>                          | <i>SED1</i>  | - structural constituent of cell wall                                                                          | 3.7                |
| <i>YOL004W</i>                          | <i>SIN3</i>  | - histone deacetylase activity                                                                                 | 2.3                |
| <i>YOR191W</i>                          | <i>RIS1</i>  | - DNA dependent ATPase activity                                                                                | 1.6                |
| <i>YGR282C</i>                          | <i>BGL2</i>  | - glucan 1,3-beta-glucosidase activity                                                                         | 2.2                |
| <i>YDR358W</i>                          | <i>GGAI</i>  | - molecular function unknown                                                                                   | 3.4                |
| <i>YMR302C</i>                          | <i>PRP12</i> | - exonuclease activity                                                                                         | 2.3                |
| <i>YDL223C</i>                          | <i>HBT1</i>  | - molecular function unknown                                                                                   | 7.3                |

| <b>YORF</b>          | <b>Gene</b>   | <b>Molecular Function</b>                                                              | <b>Fold change</b> |
|----------------------|---------------|----------------------------------------------------------------------------------------|--------------------|
| <i>YIL033C</i>       | <i>BCY1</i>   | - cAMP-dependent protein kinase inhibitor activity                                     | 2.0                |
| <i>YJL164C</i>       | <i>TPK1</i>   | - protein serine/threonine kinase activity<br>- cAMP-dependent protein kinase activity | 2.5                |
| <i>YJL100W</i>       | <i>LSB6</i>   | - 1-phosphatidylinositol 4-kinase activity                                             | 1.7                |
| <i>YDR202C</i>       | <i>RAV2</i>   | - molecular function unknown                                                           | 2.0                |
| <i>YJL042W</i>       | <i>MHP1</i>   | - structural constituent of cytoskeleton                                               | 2.7                |
| <i>YLL040C</i>       | <i>VPS13</i>  | - molecular function unknown                                                           | 2.2                |
| <i>YDL024C</i>       | <i>DIA3</i>   | - acid phosphatase activity                                                            | 3.9                |
| Down regulated genes |               |                                                                                        |                    |
| <i>YJR135W-A</i>     | <i>TIM8</i>   | - protein transporter activity                                                         | 2.5                |
| <i>YDL014W</i>       | <i>NOPI</i>   | - methyltransferase activity                                                           | 3.1                |
| <i>YOL077C</i>       | <i>BRX1</i>   | - 5S rRNA binding<br>- rRNA primary transcript binding                                 | 2.2                |
| <i>YPL234C</i>       | <i>TFP3</i>   | - hydrogen-transporting ATPase activity, rotational mechanism                          | 1.6                |
| <i>YFL004W</i>       | <i>VTC2</i>   | - molecular function unknown                                                           | 1.8                |
| <i>YNL066W</i>       | <i>SUN4</i>   | - glucosidase activity                                                                 | 6.6                |
| <i>YBR048W</i>       | <i>RPS11B</i> | - structural constituent of ribosome                                                   | 4.0                |
| <i>YDR060W</i>       | <i>MAK21</i>  | - molecular function unknown                                                           | 2.7                |
| <i>YDR418W</i>       | <i>RPL12B</i> | - structural constituent of ribosome                                                   | 3.3                |
| <i>YNL030W</i>       | <i>HHF2</i>   | - DNA binding                                                                          | 1.8                |
| <i>YDR025W</i>       | <i>RPS11A</i> | - structural constituent of ribosome                                                   | 3.2                |
| <i>YER118C</i>       | <i>SHO1</i>   | - osmosensor activity                                                                  | 1.7                |
| <i>YLR197W</i>       | <i>SIK1</i>   | - molecular function unknown                                                           | 2.8                |
| <i>YCL059C</i>       | <i>KRR1</i>   | - molecular function unknown                                                           | 2.4                |
| <i>YNR027W</i>       | <i>BUD17</i>  | - molecular function unknown                                                           | 1.9                |
| <i>YPL131W</i>       | <i>RPL5</i>   | - RNA binding<br>- structural constituent of ribosome                                  | 2.4                |
| <i>YMR307W</i>       | <i>GAS1</i>   | - 1,3-beta-glucanosyltransferase activity                                              | 2.9                |
| <i>YML073C</i>       | <i>RPL6A</i>  | - RNA binding<br>- structural constituent of ribosome                                  | 2.5                |
| <i>YML069W</i>       | <i>POB3</i>   | - chromatin binding                                                                    | 1.8                |
| <i>YLR167W</i>       | <i>RPS31</i>  | - structural constituent of ribosome<br>- ribosomal chaperone activity                 | 2.6                |
| <i>YKL185W</i>       | <i>ASH1</i>   | - specific transcriptional repressor activity                                          | 2.1                |
| <i>YML061C</i>       | <i>PIF1</i>   | - DNA helicase activity                                                                | 2.1                |
| <i>YDL226C</i>       | <i>GCSI</i>   | - ARF GTPase activator activity<br>- actin binding                                     | 1.9                |
| <i>YGR214W</i>       | <i>RPS0A</i>  | - structural constituent of ribosome                                                   | 2.7                |
| <i>YDL198C</i>       | <i>YHMI</i>   | - transporter activity                                                                 | 3.8                |
| <i>YGL100W</i>       | <i>SEH1</i>   | - structural molecule activity                                                         | 1.6                |

| <b>YORF</b>            | <b>Gene</b>   | <b>Molecular Function</b>                                                                                                   | <b>Fold change</b> |
|------------------------|---------------|-----------------------------------------------------------------------------------------------------------------------------|--------------------|
| <i>YGL099W</i>         | <i>LSG1</i>   | - GTPase activity                                                                                                           | 2.2                |
| <i>YGL097W</i>         | <i>SRM1</i>   | - signal transducer activity                                                                                                | 1.9                |
| <i>YJL158C</i>         | <i>CIS3</i>   | - structural constituent of cell wall                                                                                       | 4.2                |
| <i>YBL032W</i>         | <i>HEK2</i>   | - mRNA binding                                                                                                              | 1.6                |
| <i>YNL283C</i>         | <i>WSC2</i>   | - transmembrane receptor activity                                                                                           | 2.0                |
| <i>YBL003C</i>         | <i>HTA2</i>   | - DNA binding                                                                                                               | 6.5                |
| <i>YBL002W</i>         | <i>HTB2</i>   | - DNA binding                                                                                                               | 3.7                |
| <i>YBR245C</i>         | <i>ISW1</i>   | - ATPase activity                                                                                                           | 1.7                |
| <i>YER006W</i>         | <i>NUG1</i>   | - GTPase activity                                                                                                           | 2.0                |
| <i>YDL143W</i>         | <i>CCT4</i>   | - chaperone activity                                                                                                        | 1.7                |
| <i>YHR170W</i>         | <i>NMD3</i>   | - RNA binding<br>- protein binding                                                                                          | 2.2                |
| <i>YPR102C</i>         | <i>RPL11A</i> | - structural constituent of ribosome                                                                                        | 2.8                |
| <i>YGL030W</i>         | <i>RPL30</i>  | - structural constituent of ribosome                                                                                        | 3.1                |
| <i>YEL054C</i>         | <i>RPL12A</i> | - structural constituent of ribosome                                                                                        | 2.6                |
| <i>YDR225W</i>         | <i>HTA1</i>   | - DNA binding                                                                                                               | 5.9                |
| <i>YDR224C</i>         | <i>HTB1</i>   | - DNA binding                                                                                                               | 2.4                |
| <i>YLR409C</i>         | <i>UTP21</i>  | - snoRNA binding                                                                                                            | 2.2                |
| <i>YEL040W</i>         | <i>UTR2</i>   | - molecular function unknown                                                                                                | 4.1                |
| <i>YGR108W</i>         | <i>CLB1</i>   | - cyclin-dependent protein kinase regulator activity                                                                        | 3.2                |
| <i>YNL188W</i>         | <i>KAR1</i>   | - protein binding                                                                                                           | 1.5                |
| <i>YHR108W</i>         | <i>GGA2</i>   | - molecular function unknown                                                                                                | 2.4                |
| <i>YAL025C</i>         | <i>MAK16</i>  | - molecular function unknown                                                                                                | 3.3                |
| <i>YGR078C</i>         | <i>PAC10</i>  | - tubulin binding                                                                                                           | 2.0                |
| <i>YOL127W</i>         | <i>RPL25</i>  | - RNA binding<br>- structural constituent of ribosome                                                                       | 2.9                |
| <i>YKL013C</i>         | <i>ARC19</i>  | - structural molecule activity                                                                                              | 1.6                |
| <i>YKL009W</i>         | <i>MRT4</i>   | - molecular function unknown                                                                                                | 3.6                |
| <i>YLR353W</i>         | <i>BUD8</i>   | - molecular function unknown                                                                                                | 1.5                |
| <i>YNL153C</i>         | <i>GIM3</i>   | - tubulin binding                                                                                                           | 2.1                |
| <i>YNL142W</i>         | <i>MEP2</i>   | - ammonium transporter activity                                                                                             | 3.2                |
| <i>YGR041W</i>         | <i>BUD9</i>   | - molecular function unknown                                                                                                | 3.0                |
| <i>YHR062C</i>         | <i>RPP1</i>   | - ribonuclease P activity<br>- ribonuclease MRP activity                                                                    | 1.8                |
| <i>YJR145C</i>         | <i>RPS4A</i>  | - structural constituent of ribosome                                                                                        | 2.8                |
| <i>YJR144W</i>         | <i>MGM101</i> | - DNA binding                                                                                                               | 1.8                |
| <b>Stress response</b> |               |                                                                                                                             |                    |
| <i>YDR513W</i>         | <i>TTR1</i>   | - thiol-disulfide exchange intermediate activity<br>- glutathione peroxidase activity<br>- glutathione transferase activity | 1.9                |

| <b>YORF</b>           | <b>Gene</b>  | <b>Molecular Function</b>                                                                        | <b>Fold change</b> |
|-----------------------|--------------|--------------------------------------------------------------------------------------------------|--------------------|
| <i>YNL160W</i>        | <i>YGP1</i>  | - molecular function unknown                                                                     | 7.6                |
| <i>YGR088W</i>        | <i>CTT1</i>  | - catalase activity                                                                              | 26.9               |
| <i>YDR214W</i>        | <i>AHA1</i>  | - chaperone activator activity                                                                   | 3.8                |
| <i>YMR169C</i>        | <i>ALD3</i>  | - aldehyde dehydrogenase activity                                                                | 41.5               |
| <i>YMR250W</i>        | <i>GAD1</i>  | - glutamate decarboxylase activity                                                               | 7.1                |
| <i>YMR251W-A</i>      | <i>HOR7</i>  | - molecular function unknown                                                                     | 9.2                |
| <i>YKL150W</i>        | <i>MCR1</i>  | - cytochrome-b5 reductase activity                                                               | 6.1                |
| <i>YML070W</i>        | <i>DAK1</i>  | - glycerone kinase activity                                                                      | 5.9                |
| <i>YIL101C</i>        | <i>XBPI</i>  | - transcription factor activity                                                                  | 2.3                |
| <i>YKR066C</i>        | <i>CCP1</i>  | - cytochrome-c peroxidase activity                                                               | 7.0                |
| <i>YKR072C</i>        | <i>SIS2</i>  | - protein phosphatase inhibitor activity<br>- phosphopantothenoylcysteine decarboxylase activity | 1.9                |
| <i>YPL223C</i>        | <i>GRE1</i>  | - molecular function unknown                                                                     | 9.5                |
| <i>YBR072W</i>        | <i>HSP26</i> | - heat shock protein activity<br>- chaperone activity                                            | 23.3               |
| <i>YOL052C-A</i>      | <i>DDR2</i>  | - molecular function unknown                                                                     | 3.6                |
| <i>YFL014W</i>        | <i>HSP12</i> | - heat shock protein activity                                                                    | 36.7               |
| <i>YGR008C</i>        | <i>STF2</i>  | - molecular function unknown                                                                     | 7.3                |
| Down regulated        |              |                                                                                                  |                    |
| <i>YIL053W</i>        | <i>RHR2</i>  | DL-glycerol-3-phosphatase                                                                        | 2.7                |
| <i>YFL010C</i>        | <i>WWM1</i>  | WW domain containing protein interacting with Metacaspase MCA1                                   | 1.8                |
| <b>DNA metabolism</b> |              |                                                                                                  |                    |
| <i>YIR002C</i>        | <i>MPH1</i>  | - RNA helicase activity                                                                          | 1.9                |
| <i>YMR173W</i>        | <i>DDR48</i> | - molecular function unknown                                                                     | 4.1                |
| <i>YBR214W</i>        | <i>SDS24</i> | - molecular function unknown                                                                     | 2.6                |
| <i>YER116C</i>        | <i>SLX8</i>  | - DNA binding                                                                                    | 1.9                |
| <i>YML128C</i>        | <i>MSC1</i>  | - molecular function unknown                                                                     | 2.1                |
| Down regulated        |              |                                                                                                  |                    |
| <i>YDR097C</i>        | <i>MSH6</i>  | - ATPase activity<br>- ATP binding<br>- DNA binding                                              | 2.2                |
| <i>YER171W</i>        | <i>RAD3</i>  | - general RNA polymerase II transcription factor activity<br>- DNA helicase activity             | 1.8                |
| <i>YJR043C</i>        | <i>POL32</i> | - delta DNA polymerase activity                                                                  | 2.1                |
| <i>YDL227C</i>        | <i>HO</i>    | - endonuclease activity                                                                          | 4.1                |
| <i>YER070W</i>        | <i>RNR1</i>  | - ribonucleoside-diphosphate reductase activity                                                  | 4.6                |
| <i>YNL312W</i>        | <i>RFA2</i>  | - DNA binding                                                                                    | 2.0                |

| <b>YORF</b>              | <b>Gene</b>   | <b>Molecular Function</b>                                                                                    | <b>Fold change</b> |
|--------------------------|---------------|--------------------------------------------------------------------------------------------------------------|--------------------|
| <i>YBL035C</i>           | <i>POL12</i>  | - alpha DNA polymerase activity                                                                              | 2.4                |
| <i>YBL023C</i>           | <i>MCM2</i>   | - chromatin binding<br>- ATP dependent DNA helicase activity                                                 | 1.9                |
| <i>YOR074C</i>           | <i>CDC21</i>  | - thymidylate synthase activity                                                                              | 3.1                |
| <i>YKL113C</i>           | <i>RAD27</i>  | - 5 flap endonuclease activity                                                                               | 2.1                |
| <i>YHR154W</i>           | <i>RTT107</i> | - molecular function unknown                                                                                 | 2.1                |
| <i>YDL102W</i>           | <i>CDC2</i>   | - delta DNA polymerase activity                                                                              | 1.8                |
| <b>Protein transport</b> |               |                                                                                                              |                    |
| <i>YLR259C</i>           | <i>HSP60</i>  | - heat shock protein activity                                                                                | 2.9                |
| <i>YHL002W</i>           | <i>HSE1</i>   | - protein binding                                                                                            | 1.6                |
| <i>YBL075C</i>           | <i>SSA3</i>   | - heat shock protein activity                                                                                | 3.7                |
| <i>YGL104C</i>           | <i>VPS73</i>  | - molecular function unknown                                                                                 | 1.8                |
| <i>YDR200C</i>           | <i>VPS64</i>  | - molecular function unknown                                                                                 | 1.8                |
| <i>YKL034W</i>           | <i>TUL1</i>   | - ligase activity                                                                                            | 1.9                |
| Down regulated           |               |                                                                                                              |                    |
| <i>YGR082W</i>           | <i>TOM20</i>  | - protein transporter activity                                                                               | 1.8                |
| <i>YDR372C</i>           | <i>VPS74</i>  | - molecular function unknown                                                                                 | 1.8                |
| <i>YLR292C</i>           | <i>SEC72</i>  | - protein transporter activity                                                                               | 2.0                |
| <i>YFL045C</i>           | <i>SEC53</i>  | - phosphomannomutase activity                                                                                | 2.6                |
| <b>Metabolism</b>        |               |                                                                                                              |                    |
| <i>YDR530C</i>           | <i>APA2</i>   | - bis 5 -nucleosyl -tetrphosphatase<br>asymmetrical activity<br>- bis 5 -nucleosyl -tetrphosphatase activity | 1.7                |
| <i>YBR169C</i>           | <i>SSE2</i>   | - heat shock protein activity                                                                                | 7.1                |
| <i>YFR033C</i>           | <i>QCR6</i>   | - ubiquinol-cytochrome-c reductase activity                                                                  | 2.6                |
| <i>YBR183W</i>           | <i>YPC1</i>   | - ceramidase activity                                                                                        | 2.9                |
| <i>YEL039C</i>           | <i>CYC7</i>   | - electron carrier activity                                                                                  | 6.7                |
| <i>YOR377W</i>           | <i>ATF1</i>   | - alcohol O-acetyltransferase activity                                                                       | 2.2                |
| <i>YAL060W</i>           | <i>BDH1</i>   | - R,R -butanediol dehydrogenase activity                                                                     | 5.9                |
| <i>YDR231C</i>           | <i>COX20</i>  | - chaperone activity                                                                                         | 2.2                |
| <i>YOR020C</i>           | <i>HSP10</i>  | - chaperone activity                                                                                         | 2.3                |
| <i>YML004C</i>           | <i>GLO1</i>   | - lactoylglutathione lyase activity                                                                          | 6.4                |
| <i>YBL015W</i>           | <i>ACH1</i>   | - acetyl-CoA hydrolase activity                                                                              | 2.1                |
| <i>YLR120C</i>           | <i>YPS1</i>   | - aspartic-type endopeptidase activity                                                                       | 1.9                |
| <i>YJL166W</i>           | <i>QCR8</i>   | - ubiquinol-cytochrome-c reductase activity                                                                  | 2.7                |
| <i>YBL045C</i>           | <i>COR1</i>   | - ubiquinol-cytochrome-c reductase activity                                                                  | 2.7                |
| <i>YDL205C</i>           | <i>HEM3</i>   | - hydroxymethylbilane synthase activity                                                                      | 2.2                |
| <i>YML042W</i>           | <i>CAT2</i>   | - carnitine O-acetyltransferase activity                                                                     | 3.9                |
| <i>YML054C</i>           | <i>CYB2</i>   | - L-lactate dehydrogenase cytochrome<br>activity                                                             | 5.4                |
| <i>YPR191W</i>           | <i>QCR2</i>   | - ubiquinol-cytochrome-c reductase activity                                                                  | 3.1                |
| <i>YMR304W</i>           | <i>UBP15</i>  | - ubiquitin-specific protease activity                                                                       | 1.8                |

| <b>YORF</b>    | <b>Gene</b>  | <b>Molecular Function</b>                                                                                | <b>Fold change</b> |
|----------------|--------------|----------------------------------------------------------------------------------------------------------|--------------------|
| <i>YNR019W</i> | <i>ARE2</i>  | - sterol O-acyltransferase activity                                                                      | 1.7                |
| <i>YDR034C</i> | <i>LYS14</i> | - transcriptional activator activity                                                                     | 1.8                |
| <i>YML120C</i> | <i>NDI1</i>  | - oxidoreductase activity, acting on NADH or NADPH, quinone or similar compound as acceptor              | 7.5                |
| <i>YER141W</i> | <i>COX15</i> | - molecular function unknown                                                                             | 2.5                |
| <i>YLR228C</i> | <i>ECM22</i> | - RNA polymerase II transcription factor activity                                                        | 1.7                |
| <i>YOR219C</i> | <i>STE13</i> | - aminopeptidase activity                                                                                | 1.6                |
| Down regulated |              |                                                                                                          |                    |
| <i>YLR303W</i> | <i>MET17</i> | - O-acetylhomoserine aminocarboxypropyltransferase activity<br>- cysteine synthase activity              | 5.4                |
| <i>YDR465C</i> | <i>RMT2</i>  | - protein-arginine N-methyltransferase activity                                                          | 2.4                |
| <i>YOR241W</i> | <i>MET7</i>  | - tetrahydrofolylpolyglutamate synthase activity                                                         | 1.9                |
| <i>YOR236W</i> | <i>DFR1</i>  | - dihydrofolate reductase activity                                                                       | 2.8                |
| <i>YCR053W</i> | <i>THR4</i>  | - threonine synthase activity                                                                            | 2.4                |
| <i>YGL213C</i> | <i>SKI8</i>  | - translation repressor activity                                                                         | 1.7                |
| <i>YML126C</i> | <i>ERG13</i> | - hydroxymethylglutaryl-CoA synthase activity                                                            | 2.2                |
| <i>YML106W</i> | <i>URA5</i>  | - orotate phosphoribosyltransferase activity                                                             | 3.5                |
| <i>YGR285C</i> | <i>ZUO1</i>  | - chaperone activity                                                                                     | 1.8                |
| <i>YDR380W</i> | <i>ARO10</i> | - carboxy-lyase activity<br>- pyruvate decarboxylase activity<br>- phenylpyruvate decarboxylase activity | 3.6                |
| <i>YKL211C</i> | <i>TRP3</i>  | - anthranilate synthase activity<br>- indole-3-glycerol-phosphate synthase activity                      | 1.9                |
| <i>YGL148W</i> | <i>ARO2</i>  | - chorismate synthase activity                                                                           | 2.6                |
| <i>YML075C</i> | <i>HMG1</i>  | - hydroxymethylglutaryl-CoA reductase NADPH activity                                                     | 1.6                |
| <i>YMR300C</i> | <i>ADE4</i>  | - amidophosphoribosyltransferase activity                                                                | 2.0                |
| <i>YLR153C</i> | <i>ACS2</i>  | - acetate-CoA ligase activity                                                                            | 2.3                |
| <i>YMR274C</i> | <i>RCE1</i>  | - prenyl-dependent CAAX protease activity                                                                | 1.9                |
| <i>YDR321W</i> | <i>ASP1</i>  | - asparaginase activity                                                                                  | 2.4                |
| <i>YNL315C</i> | <i>ATP11</i> | - chaperone activity                                                                                     | 1.6                |
| <i>YER055C</i> | <i>HIS1</i>  | - ATP phosphoribosyltransferase activity                                                                 | 2.5                |
| <i>YER043C</i> | <i>SAH1</i>  | - adenosylhomocysteinase activity                                                                        | 3.1                |
| <i>YDR300C</i> | <i>PRO1</i>  | - glutamate 5-kinase activity                                                                            | 1.7                |
| <i>YPR145W</i> | <i>ASN1</i>  | - asparagine synthase glutamine-                                                                         | 4.1                |



| <b>YORF</b>        | <b>Gene</b>   | <b>Molecular Function</b>                                                                                                                                                                                                                                   | <b>Fold change</b> |
|--------------------|---------------|-------------------------------------------------------------------------------------------------------------------------------------------------------------------------------------------------------------------------------------------------------------|--------------------|
|                    |               | hydrolyzing activity                                                                                                                                                                                                                                        |                    |
| <i>YML008C</i>     | <i>ERG6</i>   | - sterol 24-C-methyltransferase activity                                                                                                                                                                                                                    | 2.7                |
| <i>YER023W</i>     | <i>PRO3</i>   | - pyrroline-5-carboxylate reductase activity                                                                                                                                                                                                                | 2.1                |
| <i>YLR100W</i>     | <i>ERG27</i>  | - 3-keto sterol reductase activity                                                                                                                                                                                                                          | 2.6                |
| <i>YBR252W</i>     | <i>DUT1</i>   | - dUTP diphosphatase activity                                                                                                                                                                                                                               | 2.4                |
| <i>YBR249C</i>     | <i>ARO4</i>   | - 3-deoxy-7-phosphoheptulonate synthase activity                                                                                                                                                                                                            | 2.8                |
| <i>YBR248C</i>     | <i>HIS7</i>   | - imidazoleglycerol phosphate synthase activity                                                                                                                                                                                                             | 2.0                |
| <i>YMR202W</i>     | <i>ERG2</i>   | - C-8 sterol isomerase activity                                                                                                                                                                                                                             | 4.0                |
| <i>YDL141W</i>     | <i>BPL1</i>   | - biotin-[acetyl-CoA-carboxylase] ligase activity<br>- biotin-[methylcrotonoyl-CoA-carboxylase] ligase activity<br>- biotin-[methylmalonyl-CoA-carboxytransferase] ligase activity<br>- biotin-[propionyl-CoA-carboxylase ATP-hydrolyzing ] ligase activity | 2.1                |
| <i>YLR066W</i>     | <i>SPC3</i>   | - signal peptidase activity                                                                                                                                                                                                                                 | 2.2                |
| <i>YLR432W</i>     | <i>IMD3</i>   | - IMP dehydrogenase activity                                                                                                                                                                                                                                | 2.2                |
| <i>YGL012W</i>     | <i>ERG4</i>   | - delta24 24-1 sterol reductase activity                                                                                                                                                                                                                    | 2.5                |
| <i>YHR128W</i>     | <i>FUR1</i>   | - uracil phosphoribosyltransferase activity                                                                                                                                                                                                                 | 3.3                |
| <i>YHR123W</i>     | <i>EPT1</i>   | - ethanolaminephosphotransferase activity                                                                                                                                                                                                                   | 1.8                |
| <i>YLR017W</i>     | <i>MEU1</i>   | - molecular_function unknown                                                                                                                                                                                                                                | 1.7                |
| <i>YKL008C</i>     | <i>LAC1</i>   | - sphingosine N-acyltransferase activity                                                                                                                                                                                                                    | 1.9                |
| <i>YDR518W</i>     | <i>EUG1</i>   | - protein disulfide isomerase activity                                                                                                                                                                                                                      | 2.2                |
| <i>YNL130C</i>     | <i>CPT1</i>   | - diacylglycerol cholinephosphotransferase activity                                                                                                                                                                                                         | 1.8                |
| <b>Sporulation</b> |               |                                                                                                                                                                                                                                                             |                    |
| <i>YLL039C</i>     | <i>UBI4</i>   | - ATP-dependent protein binding                                                                                                                                                                                                                             | 6.5                |
| <i>YLR028C</i>     | <i>ADE16</i>  | - IMP cyclohydrolase activity<br>- phosphoribosylaminoimidazolecarboxamide formyltransferase activity                                                                                                                                                       | 1.9                |
| <i>YNL202W</i>     | <i>SPS19</i>  | - 2,4-dienoyl-CoA reductase NADPH activity                                                                                                                                                                                                                  | 3.3                |
| <i>YHR139C</i>     | <i>SPS100</i> | - molecular_function unknown                                                                                                                                                                                                                                | 6.9                |
| Down regulated     |               |                                                                                                                                                                                                                                                             |                    |
| <i>YJL074C</i>     | <i>SMC3</i>   | - ATPase activity                                                                                                                                                                                                                                           | 2.4                |
| <i>YIL026C</i>     | <i>IRR1</i>   | - nuclear cohesin complex                                                                                                                                                                                                                                   | 2.6                |
| <b>Cell cycle</b>  |               |                                                                                                                                                                                                                                                             |                    |

| <b>YORF</b>                                 | <b>Gene</b>                 | <b>Molecular Function</b>                                                    | <b>Fold change</b> |
|---------------------------------------------|-----------------------------|------------------------------------------------------------------------------|--------------------|
| <i>YFR040W</i>                              | <i>SAP155</i>               | - protein serine/threonine phosphatase activity                              | 2.5                |
| <i>YMR165C</i>                              | <i>SMP2</i>                 | - molecular_function unknown                                                 | 2.4                |
| <i>YML034W</i>                              | <i>SRC1</i>                 | - molecular_function unknown                                                 | 2.5                |
| Down regulated                              |                             |                                                                              |                    |
| <i>YBR158W</i>                              | <i>AMN1</i>                 | - protein binding                                                            | 2.2                |
| <i>YAL034W-A</i>                            | <i>MTW1</i>                 | - molecular_function unknown                                                 | 1.7                |
| <i>YGL021W</i>                              | <i>ALK1</i>                 | - protein serine/threonine kinase activity                                   | 1.8                |
| <i>YDL003W</i>                              | <i>MCD1</i>                 | - molecular_function unknown                                                 | 2.8                |
| <i>YNL289W</i>                              | <i>PCL1</i>                 | - cyclin-dependent protein kinase regulator activity                         | 3.2                |
| <b>Autophagy</b>                            |                             |                                                                              |                    |
| <i>YPL154C</i>                              | <i>PEP4</i>                 | - saccharopepsin activity<br>- endopeptidase activity                        | 3.2                |
| <i>YNL223W</i>                              | <i>ATG4</i>                 | - microtubule binding                                                        | 1.6                |
| Down regulated                              |                             |                                                                              |                    |
| <b>RNA processing</b>                       |                             |                                                                              |                    |
| <i>YNR034W</i>                              | <i>SOL1</i>                 | - 6-phosphogluconolactonase activity                                         | 2.3                |
| <i>YLR107W</i>                              | <i>REX3</i>                 | - 3'-5' exonuclease activity                                                 | 1.9                |
| <i>YGR178C</i>                              | <i>PBP1</i><br><i>MRS16</i> | - molecular_function unknown                                                 | 1.7                |
| <i>YGR129W</i>                              | <i>SYF2</i>                 | - pre-mRNA splicing factor activity                                          | 2.1                |
| Down regulated                              |                             |                                                                              |                    |
| <i>YFL001W</i>                              | <i>DEG1</i>                 | - pseudouridylate synthase activity                                          | 1.5                |
| <i>YGL120C</i>                              | <i>PRP43</i>                | - ATP dependent RNA helicase activity<br>- pre-mRNA splicing factor activity | 2.6                |
| <i>YER032W</i>                              | <i>FIR1</i>                 | - molecular_function unknown                                                 | 1.8                |
| <i>YAR008W</i>                              | <i>SEN34</i>                | - tRNA-intron endonuclease activity                                          | 2.6                |
| <i>YDL051W</i>                              | <i>LHP1</i>                 | - RNA binding                                                                | 2.2                |
| <b>protein amino acid dephosphorylation</b> |                             |                                                                              |                    |
| <i>YER054C</i>                              | <i>GIP2</i>                 | - protein phosphatase regulator activity                                     | 3.9                |
| <b>Transcription</b>                        |                             |                                                                              |                    |
| <i>YIL038C</i>                              | <i>NOT3</i>                 | - 3'-5' exoribonuclease activity                                             | 1.6                |
| Down regulated                              |                             |                                                                              |                    |
| <i>YPR187W</i>                              | <i>RPO26</i>                | - DNA-directed RNA polymerase activity                                       | 2.2                |

| <b>YORF</b>                         | <b>Gene</b>   | <b>Molecular Function</b>                                                                                                                                    | <b>Fold change</b> |
|-------------------------------------|---------------|--------------------------------------------------------------------------------------------------------------------------------------------------------------|--------------------|
| <i>YOR340C</i>                      | <i>RPA43</i>  | - DNA-directed RNA polymerase activity                                                                                                                       | 2.2                |
| <i>YDL150W</i>                      | <i>RPC53</i>  | - DNA-directed RNA polymerase activity                                                                                                                       | 1.8                |
| <i>YOL005C</i>                      | <i>RPB11</i>  | - DNA-directed RNA polymerase activity                                                                                                                       | 2.0                |
| <i>YDR451C</i>                      | <i>YHP1</i>   | - specific RNA polymerase II transcription factor activity                                                                                                   | 2.8                |
| <b>Cell growth and maintainance</b> |               |                                                                                                                                                              |                    |
| <i>YDR436W</i>                      | <i>PPZ2</i>   | - protein serine/threonine phosphatase activity                                                                                                              | 1.7                |
| Down regulated                      |               |                                                                                                                                                              |                    |
| <i>YGL028C</i>                      | <i>SCW11</i>  | - glucan 1,3-beta-glucosidase activity                                                                                                                       | 2.3                |
| <b>Protein biosynthesis</b>         |               |                                                                                                                                                              |                    |
| <i>YOR317W</i>                      | <i>FAA1</i>   | - long-chain-fatty-acid-CoA ligase activity                                                                                                                  | 3.0                |
| <i>YKL201C</i>                      | <i>MNN4</i>   | - molecular function unknown                                                                                                                                 | 2.5                |
| Down regulated                      |               |                                                                                                                                                              |                    |
| <i>YOR276W</i>                      | <i>CAF20</i>  | - translation regulator activity                                                                                                                             | 2.1                |
| <i>YJR123W</i>                      | <i>RPS5</i>   | - structural constituent of ribosome                                                                                                                         | 2.9                |
| <i>YFL022C</i>                      | <i>FRS2</i>   | - phenylalanine-tRNA ligase activity                                                                                                                         | 1.9                |
| <i>YPL249C-A</i>                    | <i>RPL36B</i> | - RNA binding<br>- structural constituent of ribosome                                                                                                        | 2.3                |
| <i>YNL096C</i>                      | <i>RPS7B</i>  | - structural constituent of ribosome                                                                                                                         | 2.1                |
| <i>YDR471W</i>                      | <i>RPL27B</i> | - structural constituent of ribosome                                                                                                                         | 2.6                |
| <i>YBR084W</i>                      | <i>MIS1</i>   | - formate-tetrahydrofolate ligase activity<br>- methenyltetrahydrofolate cyclohydrolase activity<br>- methylenetetrahydrofolate dehydrogenase NADP+ activity | 2.3                |
| <i>YGL257C</i>                      | <i>MNT2</i>   | - alpha-1,3-mannosyltransferase activity                                                                                                                     | 2.4                |
| <i>YOL040C</i>                      | <i>RPS15</i>  | - structural constituent of ribosome                                                                                                                         | 2.5                |
| <i>YPL220W</i>                      | <i>RPL1A</i>  | - structural constituent of ribosome                                                                                                                         | 2.5                |
| <i>YNL069C</i>                      | <i>RPL16B</i> | - RNA binding<br>- structural constituent of ribosome                                                                                                        | 1.9                |
| <i>YNL067W</i>                      | <i>RPL9B</i>  | - structural constituent of ribosome                                                                                                                         | 2.4                |
| <i>YKR057W</i>                      | <i>RPS21A</i> | - structural constituent of ribosome                                                                                                                         | 2.3                |
| <i>YHL033C</i>                      | <i>RPL8A</i>  | - structural constituent of ribosome                                                                                                                         | 3.2                |
| <i>YIL133C</i>                      | <i>RPL16A</i> | - RNA binding<br>- structural constituent of ribosome                                                                                                        | 2.7                |
| <i>YCR046C</i>                      | <i>IMG1</i>   | - structural constituent of ribosome                                                                                                                         | 1.6                |
| <i>YLR249W</i>                      | <i>YEF3</i>   | - translation elongation factor activity                                                                                                                     | 2.3                |

| <b>YORF</b>      | <b>Gene</b>   | <b>Molecular Function</b>                                                               | <b>Fold change</b> |
|------------------|---------------|-----------------------------------------------------------------------------------------|--------------------|
| <i>YKR026C</i>   | <i>GCN3</i>   | - translation initiation factor activity                                                | 1.9                |
| <i>YDR037W</i>   | <i>KRS1</i>   | - lysine-tRNA ligase activity                                                           | 2.5                |
| <i>YGL189C</i>   | <i>RPS26A</i> | - structural constituent of ribosome                                                    | 2.1                |
| <i>YER131W</i>   | <i>RPS26B</i> | - structural constituent of ribosome                                                    | 2.8                |
| <i>YPL143W</i>   | <i>RPL33A</i> | - structural constituent of ribosome                                                    | 1.9                |
| <i>YGR264C</i>   | <i>MES1</i>   | - methionine-tRNA ligase activity                                                       | 2.0                |
| <i>YER102W</i>   | <i>RPS8B</i>  | - structural constituent of ribosome                                                    | 2.8                |
| <i>YGL147C</i>   | <i>RPL9A</i>  | - structural constituent of ribosome                                                    | 2.4                |
| <i>YIL052C</i>   | <i>RPL34B</i> | - structural constituent of ribosome                                                    | 2.1                |
| <i>YGL135W</i>   | <i>RPL1B</i>  | - structural constituent of ribosome                                                    | 2.7                |
| <i>YML063W</i>   | <i>RPS1B</i>  | - structural constituent of ribosome                                                    | 3.3                |
| <i>YKL180W</i>   | <i>RPL17A</i> | - structural constituent of ribosome                                                    | 3.5                |
| <i>YER074W</i>   | <i>RPS24A</i> | - structural constituent of ribosome                                                    | 2.1                |
| <i>YJL190C</i>   | <i>RPS22A</i> | - structural constituent of ribosome                                                    | 3.3                |
| <i>YGL123W</i>   | <i>RPS2</i>   | - structural constituent of ribosome                                                    | 2.4                |
| <i>YPL090C</i>   | <i>RPS6A</i>  | - structural constituent of ribosome                                                    | 2.5                |
| <i>YIL018W</i>   | <i>RPL2B</i>  | - structural constituent of ribosome                                                    | 3.3                |
| <i>YJL177W</i>   | <i>RPL17B</i> | - structural constituent of ribosome                                                    | 4.8                |
| <i>YER056C-A</i> | <i>RPL34A</i> | - structural constituent of ribosome                                                    | 2.9                |
| <i>YPL079W</i>   | <i>RPL21B</i> | - structural constituent of ribosome                                                    | 3.2                |
| <i>YOR096W</i>   | <i>RPS7A</i>  | - structural constituent of ribosome                                                    | 2.6                |
| <i>YDL184C</i>   | <i>RPL41A</i> | - structural constituent of ribosome                                                    | 1.9                |
| <i>YGR185C</i>   | <i>TYS1</i>   | - tyrosine-tRNA ligase activity                                                         | 1.6                |
| <i>YGL076C</i>   | <i>RPL7A</i>  | - structural constituent of ribosome                                                    | 2.0                |
| <i>YHR203C</i>   | <i>RPS4B</i>  | - structural constituent of ribosome                                                    | 2.7                |
| <i>YHR193C</i>   | <i>EGD2</i>   | - chaperone activity                                                                    | 2.1                |
| <i>YDL136W</i>   | <i>RPL35B</i> | - structural constituent of ribosome                                                    | 2.2                |
| <i>YDL133C-A</i> | <i>RPL41B</i> | - structural constituent of ribosome                                                    | 2.1                |
| <i>YGL031C</i>   | <i>RPL24A</i> | - RNA binding<br>- structural constituent of ribosome                                   | 3.2                |
| <i>YLR061W</i>   | <i>RPL22A</i> | - structural constituent of ribosome                                                    | 3.9                |
| <i>YKL081W</i>   | <i>TEF4</i>   | - translation elongation factor activity                                                | 2.9                |
| <i>YLR060W</i>   | <i>FRS1</i>   | - phenylalanine-tRNA ligase activity                                                    | 2.5                |
| <i>YGL022W</i>   | <i>STT3</i>   | - dolichyl-diphosphooligosaccharide-protein glycotransferase activity                   | 1.8                |
| <i>YEL031W</i>   | <i>SPF1</i>   | - ATPase activity, coupled to transmembrane movement of ions, phosphorylative mechanism | 2.3                |
| <i>YBR191W</i>   | <i>RPL21A</i> | - structural constituent of ribosome                                                    | 3.8                |
| <i>YBR189W</i>   | <i>RPS9B</i>  | - structural constituent of ribosome                                                    | 2.4                |
| <i>YLR388W</i>   | <i>RPS29A</i> | - structural constituent of ribosome                                                    | 2.0                |
| <i>YBR181C</i>   | <i>RPS6B</i>  | - structural constituent of ribosome                                                    | 2.5                |
| <i>YDL083C</i>   | <i>RPS16B</i> | - structural constituent of ribosome                                                    | 1.9                |

| <b>YORF</b>                | <b>Gene</b>   | <b>Molecular Function</b>                                            | <b>Fold change</b> |
|----------------------------|---------------|----------------------------------------------------------------------|--------------------|
| <i>YDL082W</i>             | <i>RPL13A</i> | - structural constituent of ribosome                                 | 3.2                |
| <i>YMR142C</i>             | <i>RPL13B</i> | - structural constituent of ribosome                                 | 2.2                |
| <i>YFR032C-A</i>           | <i>RPL29</i>  | - structural constituent of ribosome                                 | 2.1                |
| <i>YPR043W</i>             | <i>RPL43A</i> | - structural constituent of ribosome                                 | 2.8                |
| <i>YOL139C</i>             | <i>CDC33</i>  | - translation initiation factor activity                             | 2.1                |
| <i>YFR031C-A</i>           | <i>RPL2A</i>  | - structural constituent of ribosome                                 | 3.6                |
| <i>YDL061C</i>             | <i>RPS29B</i> | - structural constituent of ribosome                                 | 2.0                |
| <i>YOL121C</i>             | <i>RPS19A</i> | - structural constituent of ribosome                                 | 2.1                |
| <i>YOL120C</i>             | <i>RPL18A</i> | - structural constituent of ribosome                                 | 3.7                |
| <i>YNL162W</i>             | <i>RPL42A</i> | - structural constituent of ribosome                                 | 2.4                |
| <i>YLL045C</i>             | <i>RPL8B</i>  | - structural constituent of ribosome                                 | 2.6                |
| <i>YOR312C</i>             | <i>RPL20B</i> | - structural constituent of ribosome                                 | 3.3                |
| <i>YLR344W</i>             | <i>RPL26A</i> | - RNA binding<br>- structural constituent of ribosome                | 2.6                |
| <i>YOL097C</i>             | <i>WRS1</i>   | - tryptophan-tRNA ligase activity                                    | 2.7                |
| <i>YBR121C</i>             | <i>GRS1</i>   | - glycine-tRNA ligase activity                                       | 2.1                |
| <i>YJR143C</i>             | <i>PMT4</i>   | - dolichyl-phosphate-mannose-protein<br>mannosyltransferase activity | 3.1                |
| <i>YGR034W</i>             | <i>RPL26B</i> | - RNA binding<br>- structural constituent of ribosome                | 2.6                |
| <b>DNA damage response</b> |               |                                                                      |                    |
| Down regulated             |               |                                                                      |                    |
| <i>YNL178W</i>             | <i>RPS3</i>   | - structural constituent of ribosome                                 | 3.2                |
| <i>RNA localization</i>    |               |                                                                      |                    |
| Down regulated             |               |                                                                      |                    |
| <i>YJL080C</i>             | <i>SCP160</i> | - RNA binding                                                        | 2.6                |
